# Supplementary material
Source: PubMed Central journal article supplement (PMC240741)

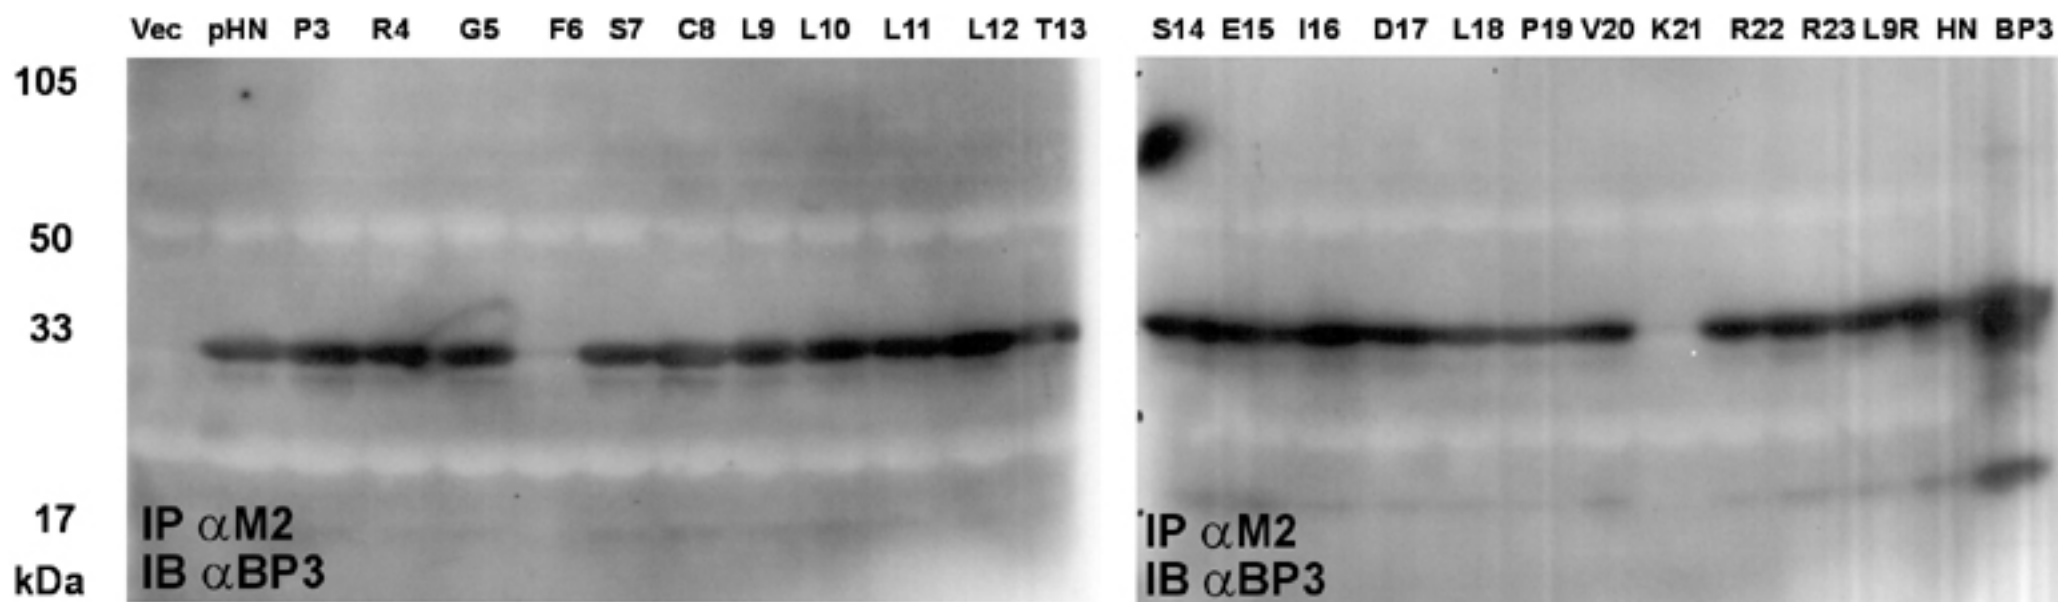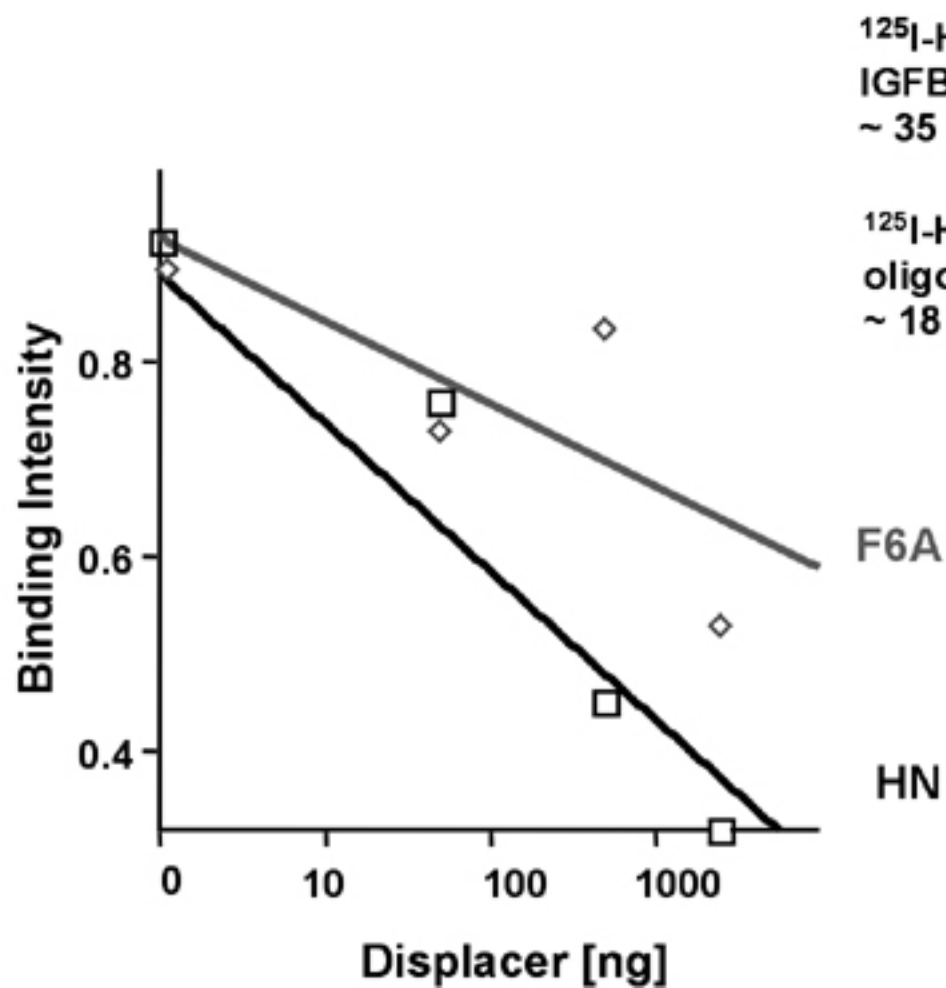

$^{125}$ I-HN +  
IGFBP-3  
~ 35 kDa →

$^{125}$ I-HN  
oligomer  
~ 18 kDa →

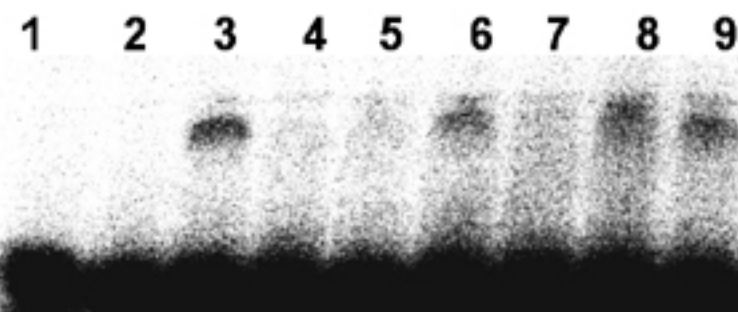

|                                |   |   |   |   |   |   |   |   |   |
|--------------------------------|---|---|---|---|---|---|---|---|---|
| $^{125}$ I-HN                  | + | + | + | + | + | + | + | + | + |
| IGFBP-3                        |   |   | + | + | + | + | + | + | + |
| HN<br>2, 1, 0.1<br>$\mu$ g     |   |   |   | + | + | + |   |   |   |
| F6A-HN<br>2, 1, 0.1<br>$\mu$ g |   |   |   |   |   |   | + | + | + |

Supplement: pnas_100_22_13042__3.pdf [file pnas_100_22_13042__3.pdf]
